# Supplementary figures and images for: Construction and Validation of an Immune‐Related Gene Prognostic Index for Esophageal Squamous Cell Carcinoma
Source: Hindawi journal article supplement (doi:10.1155/2021/7430315), 2021-01-01

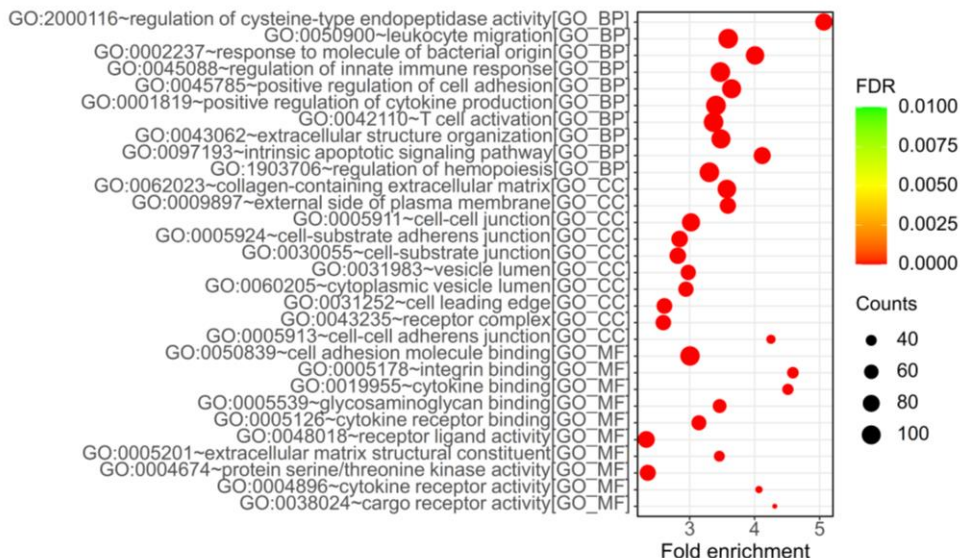

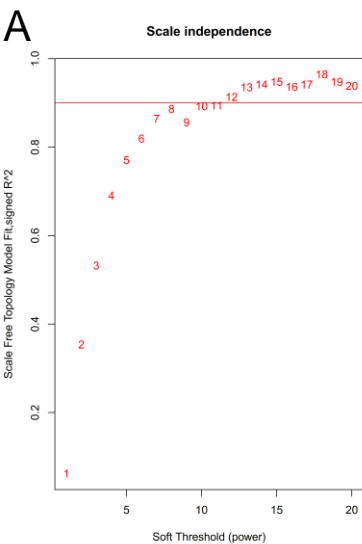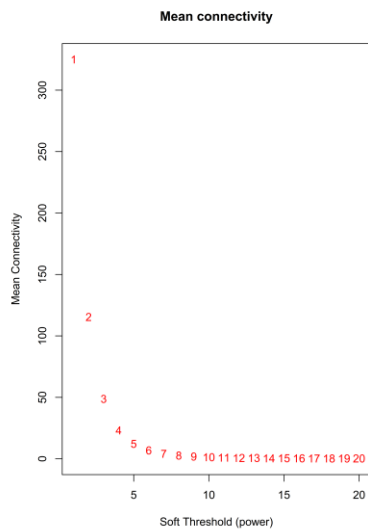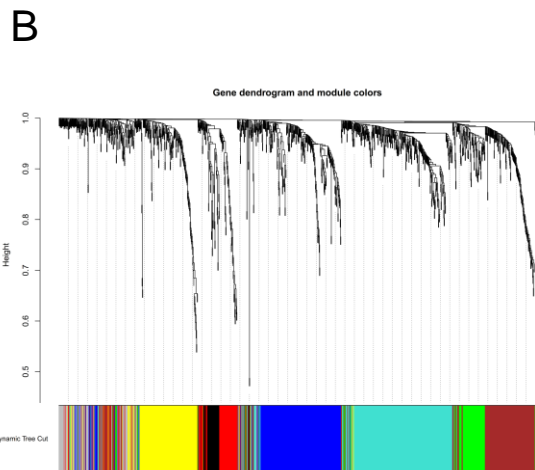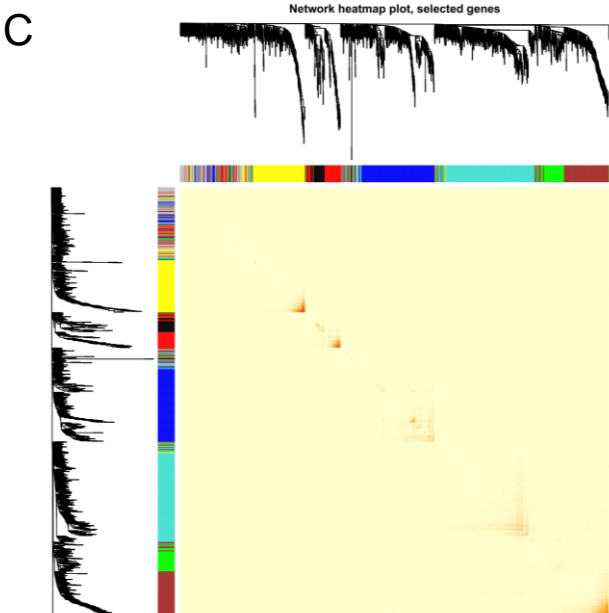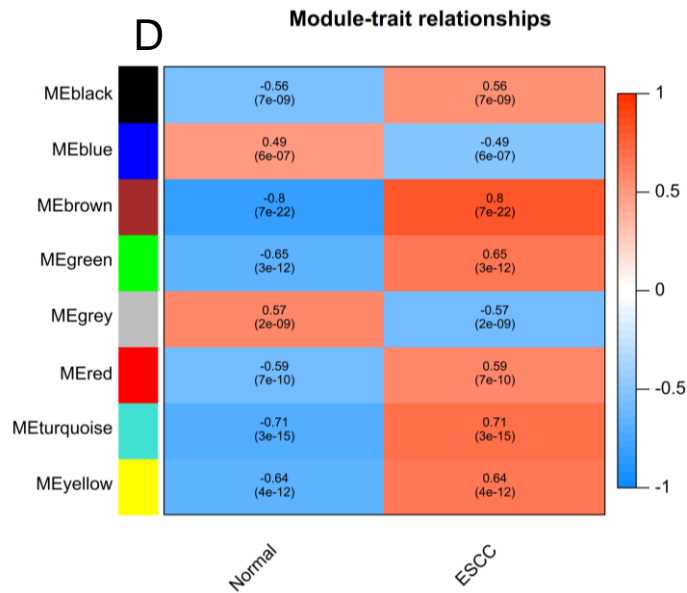

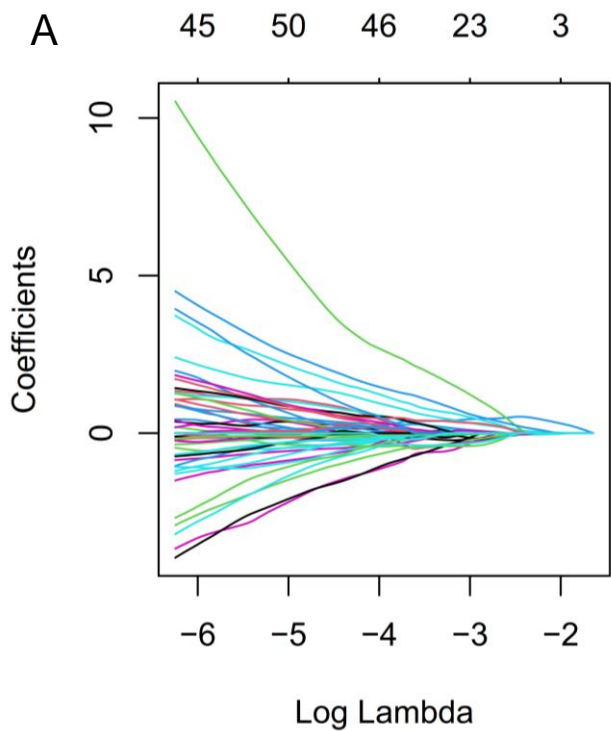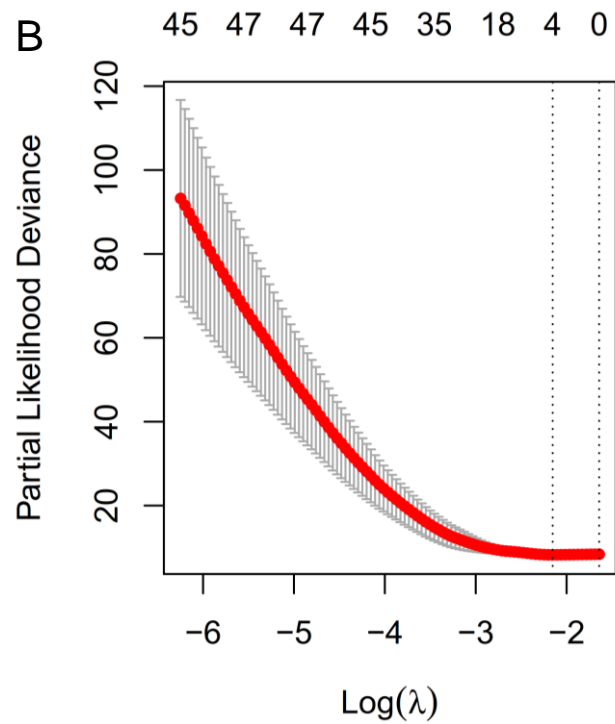

Supplement: f1 [file 7430315.f1.zip]
